# Supplementary material for: Unraveling scale-dependent flood responses to changing climate extremes over the Tibetan Plateau
Source: Research Square preprint supplement (doi:10.21203/rs.3.rs-7153596/v1), 2025-08-27
Supplement: Supplementary file 1 [file 8ab69cdde028fa294d7c6e74.pdf]

## Supporting information for

### [Unraveling scale-dependent flood responses to changing climate extremes over the Tibetan Plateau]

Xiang Li<sup>1</sup>, Peng Cui<sup>1,2</sup>, Pengke Shen<sup>3</sup>, Xueqin Zhang<sup>1\*</sup>

<sup>1</sup> Key Lab of Land Surface Pattern and Simulation, Institute of Geographic Sciences and Natural Resources Research, 11A, Datun Road, Beijing 100101, China.

<sup>2</sup> China-Pakistan Joint Research Center on Earth Sciences, Chinese Academy of Sciences and Higher Education Commission, Islamabad 45320, Pakistan.

<sup>3</sup> State Key Laboratory of Climate System Prediction and Risk Management, National Climate Center, China Meteorological Administration, Beijing 100081, China

Corresponding author: Xueqin Zhang (zhangxq@igsnr.ac.cn)

#### Content of this file

Figure S1 and S2

Table S1

#### Figure S1

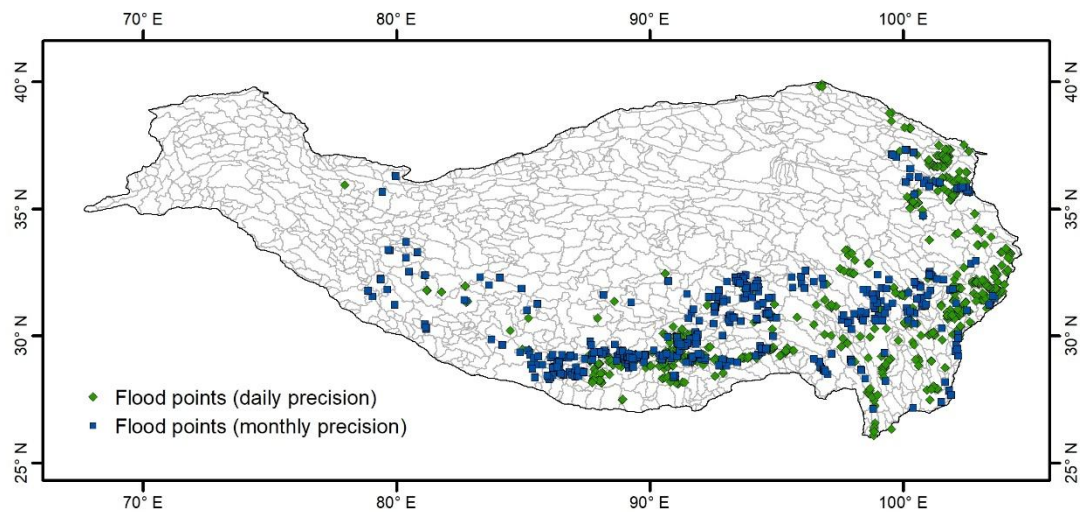

**Fig. S1** Flood point records. The green dots correspond to flood records with a precision of daily resolution, and the blue dots correspond to those with a precision of monthly resolution.

**Figure S2**

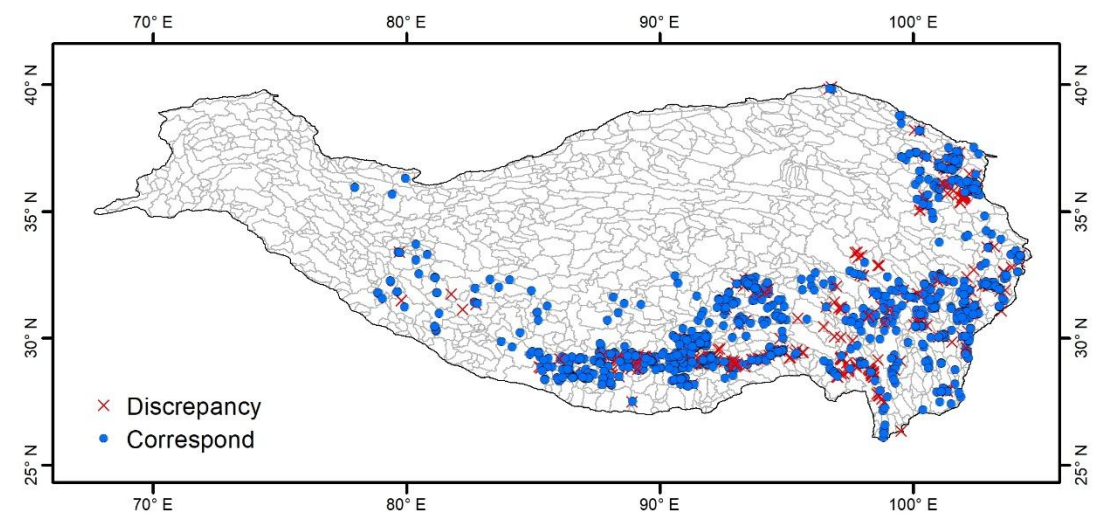

**Fig. S2** The correspondence between flood events derived from GRFR data and observed flood records

**Table S1**

**Tab. S1. Climate extreme indices**

| Index                             | Abbreviation | Definition                                                                   |
|-----------------------------------|--------------|------------------------------------------------------------------------------|
| High temperature days             | HT           | Number of days with daily maximum temperature > 90th percentile              |
| Heatwave                          | HW           | At least 3 consecutive days with daily maximum temperature > 90th percentile |
| Low temperature days              | LT           | Number of days with daily minimum temperature < 10th percentile              |
| Persistent cold spell             | CLT          | At least 3 consecutive days with daily minimum temperature < 10th percentile |
| Maximum daily maximum temperature | TXx          | Monthly highest daily maximum temperature                                    |
| Maximum daily minimum temperature | TNx          | Monthly highest daily minimum temperature                                    |
| Minimum daily maximum temperature | TXn          | Monthly lowest daily maximum temperature                                     |
| Minimum daily minimum temperature | TNn          | Monthly lowest daily minimum temperature                                     |
| Cold days                         | TX10p        | Percentage of days with daily maximum temperature < 10th percentile          |
| Warm nights                       | TN90p        | Percentage of days with daily minimum temperature > 90th percentile          |

|                                                             |        |                                                                                                           |
|-------------------------------------------------------------|--------|-----------------------------------------------------------------------------------------------------------|
| Diurnal temperature range                                   | DTR    | Monthly mean difference between daily max and min temperatures                                            |
| Frost days                                                  | FDO    | Number of days with daily minimum temperature $< 0\text{ }^{\circ}\text{C}$                               |
| Extreme precipitation days                                  | EP     | Number of days with daily precipitation $> 90\text{th}$ percentile                                        |
| Persistent extreme precipitation                            | CEP    | At least 3 consecutive days with daily precipitation $> 90\text{th}$ percentile                           |
| Heavy precipitation amount                                  | R95p   | Annual total precipitation from days $> 95\text{th}$ percentile                                           |
| Extreme wet-day precipitation                               | R99p   | Annual total precipitation from days $> 99\text{th}$ percentile                                           |
| Heavy rain days                                             | R10    | Number of days with daily precipitation $\geq 10\text{ mm}$                                               |
| Very heavy rain days                                        | R20    | Number of days with daily precipitation $\geq 20\text{ mm}$                                               |
| Consecutive wet days                                        | CWD    | Maximum number of consecutive days with daily precipitation $\geq 1\text{ mm}$                            |
| Maximum 1-day precipitation                                 | RX1day | Highest single-day precipitation amount                                                                   |
| Maximum 5-day precipitation                                 | RX5day | Highest 5-day cumulative precipitation amount                                                             |
| 1-month Standardized Precipitation Evapotranspiration Index | SPEI1  | Standardized difference between precipitation and potential evapotranspiration over 1-month timescale     |
| 3-month Standardized Precipitation Evapotranspiration Index | SPEI3  | Standardized difference between precipitation and potential evapotranspiration over 3-month timescale     |
| Palmer Drought Severity Index                               | PDSI   | Integrated measure of drought/wetness conditions considering precipitation, temperature and soil moisture |

---
